# Supplementary material for: A reconstruction of warm water inflow to Upernavik Isstrøm since AD 1925 and its relation to glacier retreat
Source: Copernicus journal article supplement (doi:10.5194/cp-2018-174), 2019-01-02
Supplement: Supplementary file 1 [file Table S1.xlsx]

## Sheet: Ark1
Agglutinated species	First descripition	Atlantic influenced	References	Arctic	References2	Indifferent	Reference3	Productivity	References3
Adercotryma glomeratum	(Brady, 1878)	x	Lloyd (2006), Lloyd et al. (2011), Perner et al. (2011), Perner et al. (2013), Sheldon et al. (2016), Wangner et al. (2018)								Table S1: Foraminifera species and environmental preferences
Cribrostomoides crassimargo	(Norman, 1858)			x	Sheldon et al. (2016)	x	Lloyd (2006), Lloyd et al. (2011), Perner et al. (2011), Perner et al. (2013), Wangner et al. (2018)
Cuneata arctica	(Brady, 1881)			x	Lloyd, (2006), Lloyd et al. (2011), Sheldon et al. (2016)
Portatrochammina bipolaris (often described as Portatrochammina karica)	Brönnimann & Whittaker, 1980			x	Jennings et al. (2017)
Reophax catella	Höglund, 1947	x	Jennings et al. (2017), Sheldon et al. (2016)			x	Wangner et al. (2018)
Reophax catenata	Höglund, 1947	x	Jennings et al. (2017)			x	Wangner et al. (2018)
Reophax subfusiformis	Earland, A. 1933	x	Jennings et al. (2017), Wangner et al. (2018)
Lagenammina difflugiformis /(often described as Saccammina difflugiformis or Reophax difflugiformis)	(Brady, 1879)	x	Perner et al. (2013), Jennings et al. (2017), Sheldon et al. (2016), Wangner et al. (2018)
Spiroplectammina biformis	(Parker & Jones, 1865)			x	Lloyd (2006), Lloyd et al. (2011), Perner et al. (2011), Perner et al. (2013), Jennings et al. (2017), Wangner et al. (2018)
Textularia earlandi	Parker, 1952	x	Jennings et al. (2017)	x	Lloyd (2006), Lloyd et al. (2011), Jennings et al. (2017), Sheldon et al. (2016), Wangner et al. (2018)
Cuneata arctica	(Brady, 1881)			x	Lloyd (2006), Lloyd et al. (2011), Perner et al. (2011), Perner et al. (2013), Jennings et al. (2017), Wangner et al. (2018)
Textularia torquata	Parker, 1952			x	Perner et al. (2013), Sheldon et al. (2016), Wangner et al. (2018)	x	Lloyd (2006), Lloyd et al. (2011), Perner et al. (2011)
Calcareous species	First descripition	Atlantic influenced	References	Arctic	References2	Indifferent	Reference3	Productivity	References3
Bolivina pseudopuncata	(Höglund, 1947)	x	Lloyd (2006)			x	Lloyd et al. (2011), Perner et al. (2011), Perner et al. (2013)	x	Sheldon et al. (2016)
Buccella frigida	(Cushman, 1922)	x	Jennings et al. (2017)			x	Lloyd et al. (2011), Perner et al. (2011), Perner et al. (2013)	x	Jennings et al. (2017)
Cassidulina reniforme	Cushman, 1930	x	Lloyd et al. (2011), Perner et al. (2011), Perner et al. (2013), Jennings et al. (2017)	x	Sheldon et al. (2016)
Cibicides lobatulus	(Walker & Jacob, 1798)					x	Lloyd (2006), Lloyd et al. (2011), Perner et al. (2011), Perner et al. (2013)
Elphidium excavatum	Cushman, 1930			x	Lloyd et al. (2011), Perner et al. (2011), Perner et al. (2013), Jennings et al. (2017), Sheldon et al. (2016)	x	Wangner et al. (2018)
Epistominella takayanagi	Iwasa, 1955
Globobulimina auriculata arctica	Höglund, 1947					x	Perner et al. (2013)
Islandiella helenae	Feyling-Hanssen & Buzas, 1976			x	Lloyd (2006), Perner et al. (2011), Perner et al. (2013), Jennings et al. (2017), Wangner et al. (2018)			x	Jennings et al. (2017)
Islandiella norcrossi	(Cushman, 1933)	x	Perner et al. (2011), Perner et al. (2013), Jennings et al. (2017), Sheldon et al. (2016), Wangner et al. (2018)	x	Lloyd (2006)
Melonis barleeanus	(Williamson, 1858)	x	Lloyd (2006), Jennings et al. (2017), Sheldon et al. (2016), Wangner et al. (2018)			x	Perner et al. (2013)	x	Jennings et al. (2017), Sheldon et al. (2016)
Nonionellina auricula	Heron-Allen & Earland, 1930
Nonionellina labradorica	(Dawson, 1860)	x	Lloyd (2006),Wangner et al. (2018)			x	Lloyd et al. (2011), Perner et al. (2011), Perner et al. (2013)	x	Jennings et al. (2017), Sheldon et al. (2016)
Nonionellina turgida	Williamson, W.C. (1858)	x	Jennings et al. (2017)					x	Jennings et al. (2017)
Pullenia osloensis	Feyling-Hanssen, 1954	x	Lloyd et al. (2011), Perner et al. (2011), Perner et al. (2013), Sheldon et al. (2016)					x	Sheldon et al. (2016)
Reussoolina laevis	(Montagu, 1803)
Silicosigmoilina groenlandica	Loeblich & Tappan, 1953
Stainforthia concava	(Höglund, 1947)			x	Lloyd (2006), Jennings et al. (2017)			x	Jennings et al. (2017), Sheldon et al. (2016)
Stainforthia feylingi	Knudsen & Seidenkrantz, 1994			x	Lloyd (2006), Lloyd et al. (2011), Perner et al. (2011), Perner et al. (2013), Jennings et al. (2017), Wangner et al. (2018)			x	Jennings et al. (2017), Sheldon et al. (2016)
Trifarina fluens	(Todd, 1948)	x	Lloyd (2006), Wangner et al. (2018)			x	Perner et al. (2013)

## Sheet: Ark2
Papers to check
Llloyd 2006
Lloyd 2011
Jennings 2017
Wangner 2018
Perner 2011
Perner2013
